# Supplementary material for: The role of H2S addition on Pt/Al2O3 catalyzed propane dehydrogenation: a mechanistic study
Source: Royal Society of Chemistry journal article supplement (doi:10.1039/c8cy02393j), 2019-01-01
Supplement: c8cy02393j1.pdf [file c8cy02393j1.pdf]

## Supporting Information

### The Role of H<sub>2</sub>S Addition on Pt/Al<sub>2</sub>O<sub>3</sub> Catalyzed Propane Dehydrogenation: A Mechanistic Study

Hai-Zhi Wang <sup>a</sup>, Wei Zhang <sup>a</sup>, Jia-Wei Jiang <sup>a</sup>, Zhi-Jun Sui <sup>a,1</sup>, Yi-An Zhu <sup>a</sup>, Guang-

Hua Ye <sup>a</sup>, De Chen <sup>b</sup>, Xing-Gui Zhou <sup>a</sup>, Wei-Kang Yuan <sup>a</sup>

<sup>a</sup> State Key Laboratory of Chemical Engineering, East China University of Science  
and Technology, Shanghai 200237, China

<sup>b</sup> Department of Chemical Engineering, Norwegian University of Science and  
Technology, N-7491 Trondheim, Norway

---

<sup>1</sup>Corresponding author. Email: zhjsui@ecust.edu.cn

*S1. The adsorption of sulfur species on Pt(111) and Pt(211) surfaces*

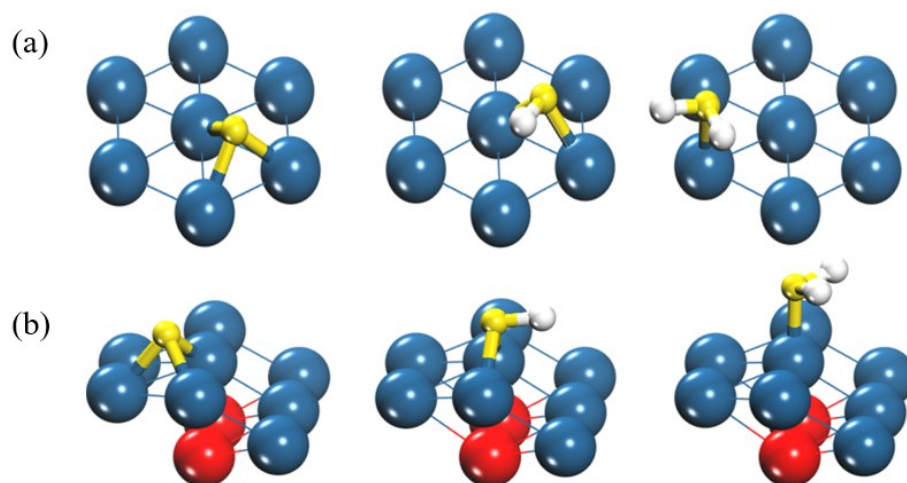

**Figure S1.** Configurations of sulfur species adsorbed on (a) Pt(111) and (b) Pt(211).

***S2. Activation energies for elementary reaction steps***

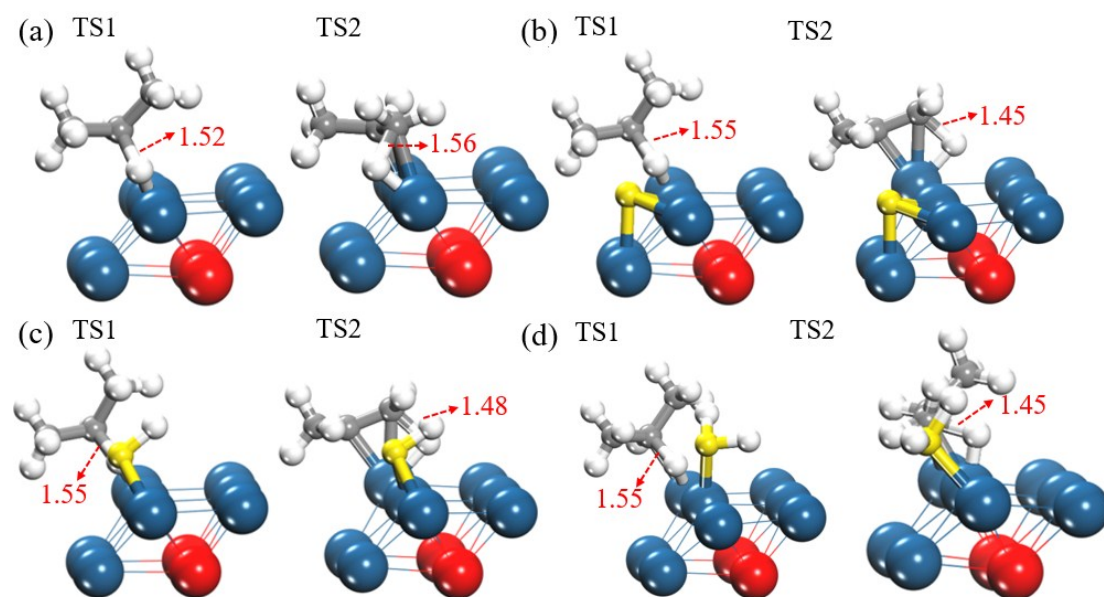

**Figure S2.** Transition state structures for PDH reaction over (a) the clean Pt(211) surface, (b) the Pt(211)&S surface, (c) the Pt(211)&SH surface, and (d) the Pt(211)&H<sub>2</sub>S surface.

**S3. The effect of hydrogen on catalytic performance for PDH**

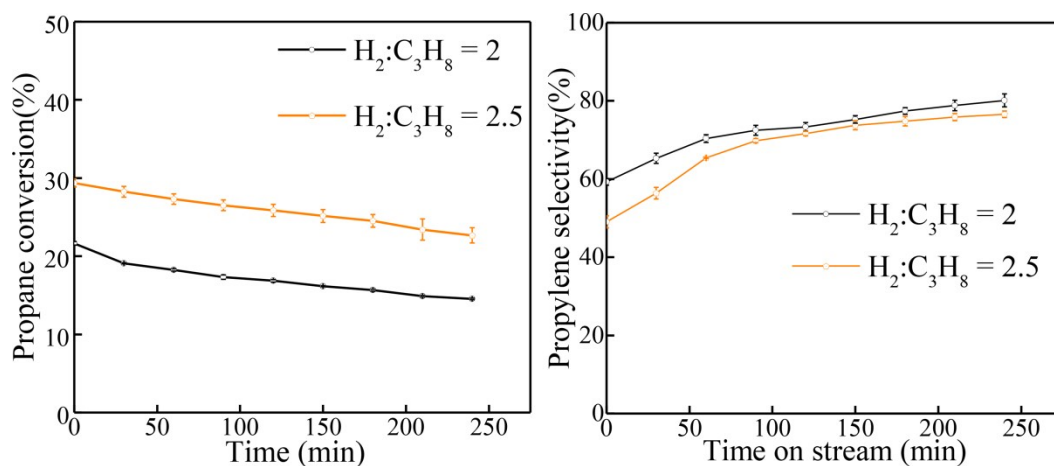

**Figure S3.** (a) Propane conversion and (b) propylene selectivity of Pt/θ-Al<sub>2</sub>O<sub>3</sub> with different molar ratios of H<sub>2</sub> to propane in the reaction feed. Reaction conditions: 0.1 g catalyst,  $P_t = 1$  atm, and  $T = 575$  °C.
